# Supplementary material
Source: Elsevier journal article supplement (https://eprints.lib.hokudai.ac.jp/dspace/bitstream/2115/57666/6/mmc5.xlsx)
Supplement: mmc5 [file mmc5.xlsx]

## Sheet: Sheet1
Table S4. Homologous proteins of CbFP in the Chlamydomonas reinhardtii flagellar proteome (CrFP) Information of CbFP includes "Accession number", "Description" and "GO annotation". Homologous proteins were obtained by BLAST (e-value cutoff ≤1e-10) 495 CbFP sequences in 657 C. reinhardtii flagellar proteins (available at http://labs.umassmed.edu/chlamyfp/index.php). The accession number and annota…
Accession number	Description	GO annotation	Homologs in CrFP	Anotation in CrFP
CBJ26575.1	dynein heavy chain	dynein heavy chain	C_220096	ODA-DHCb, Outer Dynein Arm Heavy Chain beta
CBJ30475.1	dynein heavy chain	dynein heavy chain	C_1710010	ODA-DHCg, Outer Dynein Arm Heavy Chain gamma
CBJ30911.1	Dynein heavy chain family dynein heavy chain	dynein heavy chain	C_670028	ODA-DHCa, Outer Dynein Arm Heavy Chain alpha
CBJ26132.1	PAS/PAC sensor hybrid histidine kinase putative blue light receptor	pas pac sensor protein	C_120056	PHOT, Putative Blue Light Receptor
CBJ25902.1	Dynein-1-alpha heavy chain	dynein heavy chain	C_1150005	IA1-DHC1a. Inner Dynein Arm Heavy Chain 1-alpha
CBJ26065.1	beta tubulin	beta-tubulin	C_70152	TUB2, beta-2 tubulin
CBJ30701.1	beta tubulin	beta-tubulin	C_70152	TUB2, beta-2 tubulin
CBN79446.1	beta tubulin	beta-tubulin	C_70152	TUB2, beta-2 tubulin
CBJ26064.1	beta tubulin	beta-tubulin	C_70152	TUB2, beta-2 tubulin
CBN79844.1	dynein heavy chain	dynein heavy chain	C_80197	DHC2, Dynein Heavy Chain 2
CBJ29733.1	dynein heavy chain	dynein heavy chain	C_220096	ODA-DHCb, Outer Dynein Arm Heavy Chain beta
CBN77378.1	alpha tubulin	alpha tubulin 1	C_30120	TUA1, alpha-1 tubulin
CBJ27165.1	dynein heavy chain	dynein heavy chain axonemal	C_360006	DHC6, Dynein Heavy Chain 6
CBJ32211.1	axonemal 1-beta dynein heavy chain dynein heavy chain	heavy chain 2	C_10076	IA1-DHC1b, Inner Dynein Arm Heavy Chain 1-beta
CBJ32648.1	viral A-type inclusion protein	viral a-type inclusion protein
CBN79445.1	beta tubulin	beta-tubulin	C_70152	TUB2, beta-2 tubulin
CBJ28184.1	alpha tubulin	alpha tubulin 1	C_30120	TUA1, alpha-1 tubulin
CBJ30094.1	dynein heavy chain	dynein heavy chain axonemal	C_80197	DHC2, Dynein Heavy Chain 2
CBJ27929.1	conserved unknown protein	function unknown protein	C_1880008	FLA10, Kinesin-II Motor Protein
CBN74482.1	conserved unknown protein	creatine kinase s- mitochondrial precursor
CBJ30119.1	14-3-3-like protein	14-3-3-like protein	C_1090001	FTT, 14-3-3
CBN74485.1	dynein heavy chain	dynein heavy chain	C_80197	DHC2, Dynein Heavy Chain 2
CBJ25570.1	dynein heavy chain	dynein heavy chain	C_670028	ODA-DHCa, Outer Dynein Arm Heavy Chain alpha
CBJ49096.1	calmodulin-binding WW domain protein	calmodulin-binding ww domain protein
CBJ29295.1	Molecular chaperones HSP70/HSC70, HSP70 superfamily	heat shock protein 70	C_1340012	HSP70, Heat Shock 70 kDa Protein
CBJ26725.1	n/a	echinoderm microtubule-associated 6	C_960029	Similar to Echinoderm Microtubule Associated Protein Like 5
CBN78680.1	dynein heavy chain	dynein heavy chain	C_1710010	ODA-DHCg, Outer Dynein Arm Heavy Chain gamma
CBN75085.1	conserved unknown protein	ef hand family protein
CBN79394.1	Molecular chaperones HSP70/HSC70, HSP70 superfamily	heat shock protein 70	C_1340012	HSP70, Heat Shock 70 kDa Protein
CBN77184.1	conserved unknown protein (Partial)	e3 ubiquitin-protein ligase ubr4
CBJ27642.1	Putative	sperm associated antigen 6	C_80166	PF16, Central Pair Protein
CBJ48797.1	conserved unknown protein	guanine nucleotide-binding protein subunit beta	C_250023	FAP89, Conserved Uncharacterized Flagellar Associated Protein, Similar to Notchless
CBN75228.1	Serine/threonine protein kinase, possibly NIMA-like	protein kinase domain containing protein	C_1220044	CNK2, NIMA-Related Kinase 2
CBJ29082.1	conserved unknown protein	ptype atpase	C_680011	FAP45, Flagellar Associated Protein Weakly Similar to Nasopharyngeal Epithelium Specific Protein 1
CBN76243.1	dynein heavy chain dynein heavy chain	low quality protein: cytoplasmic dynein 2 heavy chain 1-like	C_750046	DHC1b, Cytoplasmic Dynein Heavy Chain 1b
CBJ30601.1	actin	actin	C_1310009	IDA5, Actin, Inner Dynein Arm Intermediate Chain
CBJ48496.1	flagellar associated protein putative: flagellar associated protein	flagellar associated protein	C_630058	FAP52, Conserved Uncharacterized Flagellar Associated Protein
CBJ30163.1	similar to titin isoform N2-B	function unknown protein
CBN78362.1	conserved unknown protein	hect e3 ubiquitin
CBJ48439.1	Hypothetical leucine rich repeat and MORN domain-containing protein	morn repeat protein	C_120055	RSP1, Radial Spoke Protein 1
CBJ29368.1	zinc finger, CW-type with coiled-coil domain 3	morc family cw-type zinc finger protein 3
CBN79774.1	C2 domain containing protein	c2 domain containing protein
CBN74276.1	putative, Dynein intermediate chain	dynein-like protein	C_370072	ODA-IC2, Outer Dynein Arm Intermediate Chain 2
CBJ49241.1	Dynein heavy chain	dynein heavy chain axonemal	C_360006	DHC6, Dynein Heavy Chain 6
CBN74880.1	conserved unknown protein	copine-5
CBN75297.1	conserved unknown protein	kinesin-ii 95 kda	C_1880008	FLA10, Kinesin-II Motor Protein
CBJ32625.1	putative, Dynein intermediate chain	dynein intermediate chain 2	C_960025	ODA-IC1, Outer Dynein Arm Intermediate Chain 1
CBJ25862.1	conserved unknown protein	sodium potassium-transporting atpase subunit	C_370080	Similar to Calcium-Transporting ATPase
CBN76110.1	similar to neurobeachin like 1	neurobeachin-like protein 1-like
CBN75740.1	NB-ARC and TPR repeat-containing protein	nb-arc and tpr repeat-containing protein	C_110068	FAP185, Conserved Uncharacterized Flagellar Associated Protein
CBJ31848.1	conserved unknown protein	phd finger protein 15
CBJ30515.1	kinesin K39	kinesin k39
CBN75219.1	hypothetical protein Esi_0072_0084	hypothetical protein Esi_0072_0084
CBN75086.1	dynein heavy chain	cytoplasmic dynein 1 heavy chain 1	C_80197	DHC2, Dynein Heavy Chain 2
CBN74670.1	similar to asp (abnormal spindle)-like, microcephaly associated	abnormal spindle-like microcephaly-associated protein homolog
CBJ32357.1	conserved unknown protein	kinesin-like protein	C_160226	FLA8 Kinesin II Motor Protein
CBJ27915.1	Flagellar Associated Protein	transcription factor iib	C_100132	FAP20, Transcription Factor 2-Like Flagellar Associated Protein
CBJ30272.1	GPA1, alpha subunit of a heterotrimeric G protein	g-protein alpha subunit 1
CBJ31041.1	dynein heavy chain	sporangia induced dynein heavy chain	C_80197	DHC2, Dynein Heavy Chain 2
CBN80217.1	conserved unknown protein	function unknown protein
CBJ27930.1	conserved unknown protein	80 kda mcm3-associated protein
CBJ27230.1	conserved unknown protein	translocator of the inner chloroplast envelope membrane 110k
CBJ33597.1	conserved unknown protein	polymorphic outer membrane protein g i family
CBN77747.1	conserved unknown protein	possible vacuolar protein
CBN77527.1	conserved unknown protein	polyglutamine-binding protein 1
CBJ28846.1	conserved unknown protein	camp-dependent protein kinase catalytic	C_50062	PKG, Similar to cGMP-Dependent Protein Kinase
CBJ31040.1	dynein heavy chain	dynein heavy chain axonemal	C_80197	DHC2, Dynein Heavy Chain 2
CBJ27106.1	similar to Dynein heavy chain 3, axonemal (Axonemal beta dynein heavy chain 3) (Ciliary dynein heavy chain 3), partial	dynein heavy chain axonemal	C_3310003	Dynein Heavy Chain, Similar to DHC9, All peptides are also found in DHC9
CBN78653.1	hypothetical protein Esi_0141_0038	hypothetical protein Esi_0141_0038
CBJ31249.1	conserved unknown protein	nipped-b-like protein
CBJ27566.1	conserved unknown protein	myosinlike protein
CBN75980.1	conserved unknown protein	p-loop containing nucleoside triphosphate hydrolase protein
CBN79292.1	hypothetical protein Esi_0196_0057	hypothetical protein Esi_0196_0057
CBJ25705.1	conserved unknown protein	nuclear condensin complex subunit smc4
CBJ27557.1	conserved unknown protein	kinesinlike protein
CBN74395.1	conserved unknown protein	u5 small nuclear ribonucleoprotein 200 kda helicase
CBJ32574.1	conserved unknown protein	kinesin k39
CBJ31269.1	ubiquitin carboxyl-terminal hydrolase 64E	ubiquitin carboxyl-terminal hydrolase 47
CBN78200.1	hypothetical protein Esi_0103_0059	hypothetical protein Esi_0103_0059
CBJ28078.1	S-Adenosyl homocysteine hydrolase	s-adenosyl homocysteine hydrolase	C_120077	SAH1, Similar to Adenosylhomocysteinase (S-Adenosyl-L-Homocysteine Hydrolase)
CBJ30984.1	putative: flagellar radial spoke protein 4	radial spoke head protein 4 homolog a	C_1810004	RSP4, Radial Spoke Protein 4
CBJ25983.1	putative: flagellar/basal body protein, PACRG (parkin co-regulated gene)-like protein	parkin coregulated gene	C_20334	Parkin Co-Regulated Gene Protein
CBJ34064.1	Dynein heavy chain family	dynein gamma flagellar outer arm	C_1150005	IA1-DHC1a. Inner Dynein Arm Heavy Chain 1-alpha
ABY66163.1	origin-binding protein	replication origin-binding protein
CBJ30186.1	conserved unknown protein	function unknown protein	C_160066	FAP54, Conserved Uncharacterized Flagellar Associated Protein
CBJ31209.1	similar to deubiquitinating enzyme 3	ubiquitin carboxyl-terminal hydrolase
CBJ49075.1	Hydrocephalus-inducing protein, Hydin-like protein	hydrocephalus-inducing protein homolog	C_410060	HYD3, Hydrocephalus 3-Like Protein
CBJ30123.1	conserved unknown protein	ubiquitin carboxyl-terminal hydrolase family protein
CBJ27696.1	conserved unknown protein	serine threonine-protein
CBJ29742.1	Histone hairpin binding protein	histone gene transcript 5 hairpin-binding protein
CBN75111.1	p28, 28 kDa light chain of axonemal inner dynein arms	axonemal dynein light chain p33	C_740003	IA-IC28, Inner Dynein Arm Light Chain p28
CBN76027.1	actin-1	actin	C_1310009	IDA5, Actin, Inner Dynein Arm Intermediate Chain
CBN76850.1	expressed unknown protein	expressed unknown protein
CBJ32946.1	conserved unknown protein	conserved oligomeric golgi complex subunit 3
CBN77571.1	similar to CG7697-PA	myotubularin-related protein 2
CBN76592.1	WD-40 repeat protein	wd-40 repeat protein	C_60061	FAP148, Flagellar Associated Protein With Cation Channel Domain
CBN74693.1	conserved unknown protein	leucine-rich repeat-containing protein	C_1910003	Similar to MAP3K delta-1 Protein Kinase
CBJ27986.1	conserved unknown protein	protein xrp2-like
CBJ25694.1	ATP-binding region, ATPase-like	mhck ef2 kinase domain family protein
CBJ49037.1	conserved unknown protein	conserved unknown protein
CBN76011.1	ARL3, ARF-like Ras superfamily GTPase	adp-ribosylation factor-like protein 3-like	C_1780022	ARLC2, Similar to ADP-Ribosylation Factor-Like Protein, DrScorpion
CBJ28741.1	conserved unknown protein	protein phosphatase 2c containing protein	C_1390004	PP2C, Similar to Protein Phosphatase 2C
CBJ48386.1	calcium-binding protein	calcium-binding protein
CBJ31039.1	conserved unknown protein	ef hand family protein
CBN75620.1	ef-hand domain (C-terminal) containing protein	ef-hand domain (c-terminal) containing protein	C_680086	RIB72, nucleoside-diphosphokinase regulatory subunit p72
CBN75029.1	conserved unknown protein	calcyphosin-like protein
CBJ49240.1	dynein heavy chain	dynein heavy chain axonemal-like	C_360006	DHC6, Dynein Heavy Chain 6
CBJ26926.1	hypothetical protein Esi_0050_0074	hypothetical protein Esi_0050_0074
CBN78346.1	villin	protein flightless-1
CBN79249.1	WD repeat protein	wd repeat-containing protein 52	C_730006	FAP44, Conserved Uncharacterized Flagellar Associated Protein
CBN76039.1	conserved unknown protein	eukaryotic translation initiation factor 2-alpha	C_120056	PHOT, Putative Blue Light Receptor
CBN76709.1	bromodomain-containing protein	bromodomain-containing protein
CBJ48390.1	flagellar associated protein	flagellar associated protein	C_170072	FAP47, Flagellar Assoicated Protein with Weak Similarity to Hydrocephalus 3 Protein
CBN80237.1	conserved unknown protein	function unknown protein	C_160119	CNK6, NIMA-related kinase 6
CBJ31412.1	conserved unknown protein	tubulin-tyrosine ligase family protein	C_870039	FAP267, Conserved Uncharacterized Protein Similar to Tubulin-Tyrosine Ligase
CBN77275.1	expressed unknown protein	expressed unknown protein
CBN79404.1	conserved unknown protein	centrosomal protein of 290 kda
CBN76623.1	conserved unknown protein	baculoviral iap repeat-containing protein 6	C_410080	Similar to Ubiquitin-Conjugating Enzyme
CBJ32416.1	expressed unknown protein	expressed unknown protein
CBJ26407.1	conserved unknown protein	conserved unknown protein
CBJ48999.1	trithorax 3	histone-lysine n-methyltransferase atx3
CBN79744.1	conserved unknown protein	t-complex protein 1 subunit theta	C_110180	Similar to T-complex protein 1 epsilon subunit, putative chaperonin
CBN76485.1	outermembrane protein	kelch repeat type 1-containing protein
CBJ48636.1	Trehalose 6-phosphate synthase, family GT20 / Trehalose 6-phosphate phosphatase	trehalose-6-phosphate synthase
CBJ48559.1	hypothetical protein Esi_0025_0128	hypothetical protein Esi_0025_0128
CBJ26303.1	Hypothetical leucine rich repeat protein	histidine kinase a
CBJ30016.1	similar to kinesin-related protein	cell wall surface anchor family protein
CBJ28571.1	conserved unknown protein	multidrug resistance protein 1
CBJ28568.1	ATP-binding cassette, sub-family B (MDR/TAP), member 1A	multidrug resistance protein 1
CBJ25762.1	n/a	radial spoke protein 7	C_450030	Similar to Calcium-Dependent protein Kinase
CBJ29923.1	conserved unknown protein	kinesin-like calmodulin-binding protein homolog	C_160226	FLA8 Kinesin II Motor Protein
CBN76893.1	conserved unknown protein	kinesin family member 17	C_160226	FLA8 Kinesin II Motor Protein
CBN76841.1	conserved unknown protein	mitotic spindle assembly checkpoint protein mad1 put
CBJ28164.1	conserved unknown protein	wd repeat-containing protein 96	C_310047	FAP43, Conserved Uncharacterized Flagellar Associated Protein
CBN77300.1	conserved unknown protein	tetratricopeptide repeat protein 18
CBN75166.1	conserved unknown protein	flagellar outer dynein arm-docking complex protein 1	C_970037	ODA-DC2, Outer Dynein Arm Docking Complex 2, Mr 70,000
CBN79061.1	Mannosyl-oligosaccharide 1,2-alpha-mannosidase, family GH47	mannosyl-oligosaccharide alpha- -
CBJ25616.1	Ankyrin, TRAF-type zinc finger protein	tnf receptor-associated factor 4
CBJ29665.1	SUDD-like protein	rio kinase
CBN78602.1	membrane acyl-CoA binding protein	ankyrin repeat-rich vertebrate like protein
CBN73979.1	hypothetical protein Esi_0009_0152	hypothetical protein Esi_0009_0152
CBN74449.1	conserved unknown protein	conserved unknown protein
CBJ30895.1	component of dynein regulatory complex	growth arrest-specific protein 8	C_1410017	PF2, Dynein Regulatory Complex Protein
CBJ30051.1	conserved unknown protein	cytoskeleton-associated protein 5
CBJ25956.1	Aquarius intron-binding protein similar to aquarius	intron-binding protein aquarius
CBJ25788.1	conserved unknown protein	atpase family aaa domain-containing protein 1	C_270130	CDC48, Conserved AAA Domain Protein
CBJ32185.1	EF-hand, calcium binding motif	ef hand family protein
CBJ49101.1	outer dynein arm docking complex protein like	flagellar outer dynein arm-docking complex protein 1	C_970037	ODA-DC2, Outer Dynein Arm Docking Complex 2, Mr 70,000
CBJ26209.1	hypothetical protein Esi_0027_0085	hypothetical protein Esi_0027_0085
CBN77602.1	hypothetical protein Esi_0004_0241	hypothetical protein Esi_0004_0241
CBJ33154.1	conserved unknown protein	laminin subunit beta-2-like
CBN74090.1	hypothetical protein Esi_0012_0173	hypothetical protein Esi_0012_0173
CBN79559.1	expressed unknown protein	expressed unknown protein
CBN77511.1	conserved unknown protein	conserved unknown protein
CBN78335.1	flagellar associated protein	tetratricopeptide repeat protein 21b	C_270146	FAP60, Conserved Uncharacterized Flagellar Associated Protein
CBJ32356.1	conserved unknown protein	function unknown protein
CBJ30420.1	calcium-dependent protein kinase	calcium-dependent protein	C_170065	FAP223, Flagellar Associated Protein Similar to Calcium-Dependent Protein Kinase
CBN78272.1	Zinc finger, C2H2 type family protein	protein fam164c-like
CBJ27360.1	hypothetical protein Esi_0067_0046	hypothetical protein Esi_0067_0046
CBJ33724.1	hypothetical protein Esi_0571_0007	hypothetical protein Esi_0571_0007
CBN73772.1	hypothetical protein Esi_0007_0016	hypothetical protein Esi_0007_0016
CBN78737.1	expressed unknown protein	expressed unknown protein
CBJ48903.1	hypothetical protein Esi_0057_0075	hypothetical protein Esi_0057_0075
CBJ48622.1	NB-ARC and TPR repeat-containing protein	nb-arc and tpr repeat-containing protein	C_110068	FAP185, Conserved Uncharacterized Flagellar Associated Protein
CBJ32705.1	serine/threonine kinase, putative	isoform cra_a	C_800022	Similar to Calcium/Calmodulin-Dependent Protein Kinase
CBJ26371.1	similar to Probable phospholipid-transporting ATPase ID (ATPase class I type 8B member 2)	phospholipid-transporting atpase 3
CBJ48552.1	conserved unknown protein	protein kinase
CBN76676.1	conserved unknown protein	function unknown protein
CBN77292.1	conserved unknown protein	coiled-coil domain-containing protein 135	C_14900001	Hypothetical Protein
CBN79789.1	conserved unknown protein	inactive ubiquitin carboxyl-terminal hydrolase 54
CBJ33084.1	Hypothetical leucine rich repeat calcium binding protein	hypothetical leucine rich repeat calcium binding protein	C_150073	FAP264, Conserved Uncharacterized Protein
CBJ32547.1	hypothetical protein Esi_0346_0017	hypothetical protein Esi_0346_0017
CBJ29950.1	conserved unknown protein	function unknown protein
CBN77360.1	expressed unknown protein	expressed unknown protein
CBN77274.1	phosphatidylinositol kinase (PIK-5)	serine-protein kinase atm
CBN78603.1	conserved unknown protein	psp1 family protein
CBN75826.1	Rieske (2Fe-2S) domain protein	rieske (2fe-2s) domain protein
CBJ29477.1	conserved unknown protein	ankyrin repeat domain-containing protein 13c
CBN79257.1	kinesin-like protein	kinesin motor domain-containing protein	C_50080	KLP1, Kinesin-Like Protein 1
CBJ34040.1	conserved unknown protein	camp-dependent protein kinase regulatory subunit	C_740056	Similar to Cyclic Nucleotide Dependent Protein Kinase
CBN79251.1	conserved unknown protein	ubiquitin c	C_330025	Similar to Polyubiquitin
CBJ31790.1	Protofilament ribbon protein of flagellar microtubules	protofilament ribbon protein of flagellar microtubules	C_680086	RIB72, nucleoside-diphosphokinase regulatory subunit p72
CBN79758.1	peptidyl-prolyl cis-trans isomerase, cyclophilin-type	cyclophilin-like protein	C_3230001	Peptidylprolyl Isomerase, Cyclophilin 1, Similar to Radial Spoke Protein RSP12
CBJ27187.1	conserved unknown protein	calcium calmodulin-dependent 3 -cyclic nucleotide phosphodiesterase 1a	C_1010057	Similar to Phosphodiesterase
CBN75582.1	conserved unknown protein	rib43a-like with coiled-coils protein 2-like
CBJ48836.1	eIF-2alpha kinase GCN2 similar to Eukaryotic translation initiation factor 2-alpha kinase 4 (GCN2-li	eukaryotic translation initiation factor 2 alpha kinase 4	C_100034	FA2, Protein Kinase
CBJ29363.1	flagellar associated protein	flagellar associated protein	C_230118	FAP58, Conserved Uncharacterized Flagellar Associated Protein
CBJ27535.1	possible vacuolar protein	possible vacuolar protein
CBJ26305.1	protein phosphatase 2A regulatory subunit	serine threonine-protein phosphatase 2a 65 kda regulatory subunit a beta isoform-like	C_1410025	PP2A, Protein Phosphatase 2a
CBN78008.1	hypothetical protein Esi_0082_0014	hypothetical protein Esi_0082_0014
CBJ26771.1	conserved unknown protein	radial spoke head protein 9 homolog	C_450112	RSP9, Radial Spoke Protein 9
CBN76571.1	metallo-beta-lactamase superfamily protein	metallo-beta-lactamase
CBJ32553.1	hypothetical protein Esi_0346_0039	hypothetical protein Esi_0346_0039
CBJ32365.1	conserved unknown protein	kinesin family member 3c	C_1880008	FLA10, Kinesin-II Motor Protein
CBJ29609.1	Trehalose 6-phosphate synthase, family GT20 / Trehalose 6-phosphate phosphatase	trehalose-6-phosphate synthase
CBJ48736.1	conserved unknown protein	set domain containing protein
CBN78805.1	conserved unknown protein	nuclear segregation protein
CBN78900.1	conserved unknown protein	annexin a6 isoform 1
CBJ48959.1	conserved unknown protein	nucleolar protein 6
CBN79728.1	RecName: Full=Mitogen-activated protein kinase kinase kinase A; AltName: Full=MAPK/ERK kinase 1; Short=MEK kinase 1; Short=MEKK 1; AltName: Full=MAPK/ERK kinase A; Short=MEK kinase A; Short=MEKK A; Sh	mitogen-activated protein kinase kinase kinase anp1-like	C_100034	FA2, Protein Kinase
CBN78817.1	hypothetical protein Esi_0145_0025	hypothetical protein Esi_0145_0025
CBN76577.1	conserved unknown protein	voltagegated ion channel superfamily
CBN75116.1	dynein intermediate chain family	wd repeat domain 78	C_160036	IDA-IC138, Inner dynein arm intermediate chain IC138
CBJ33628.1	conserved unknown protein	abc transporter
CBJ33287.1	conserved unknown protein	neurofilament triplet l	C_970037	ODA-DC2, Outer Dynein Arm Docking Complex 2, Mr 70,000
CBJ28633.1	SNF2 helicase	e3 ubiquitin-protein ligase shprh	C_120055	RSP1, Radial Spoke Protein 1
CBJ28578.1	TiTiN family member (ttn-1)	in family member (ttn-1)	C_1310009	IDA5, Actin, Inner Dynein Arm Intermediate Chain
CBN78818.1	conserved unknown protein	condensin-2 complex subunit g2
CBN78457.1	hypothetical protein Esi_0121_0054	hypothetical protein Esi_0121_0054
CBN79560.1	conserved unknown protein	n/a
CBN78176.1	Glutamate synthase (NADH/NADPH-dependent), C-terminal part	glutamate synthase
CBN73887.1	conserved unknown protein	ring zinc finger-containing protein
CBJ32852.1	NB-ARC and TPR repeat-containing protein-likely pseudogene	nb-arc and tpr repeat-containing protein	C_110068	FAP185, Conserved Uncharacterized Flagellar Associated Protein
CBJ32409.1	hypothetical protein Esi_0337_0010	hypothetical protein Esi_0337_0010
CBJ26199.1	LRR-GTPase of the ROCO family	lrr-gtpase of the roco family
CBJ30503.1	conserved unknown protein	cold shock domain-containing protein e1-like
CBJ28673.1	conserved unknown protein	conserved unknown protein
CBJ33599.1	conserved unknown protein	conserved unknown protein
CBJ32683.1	conserved unknown protein	conserved unknown protein
CBJ28360.1	conserved unknown protein	conserved tpr domain protein
CBJ27438.1	Hypothetical leucine rich repeat calmodulin binding protein	hypothetical leucine rich repeat calmodulin binding protein
CBN77248.1	conserved unknown protein	condensin complex subunit 1
CBN77554.1	hypothetical protein (Partial)	hypothetical protein (Partial)
CBN79785.1	GJ12915	protein phosphatase	C_380021	Similar to Protein Phosphatase 2C
CBN78522.1	expressed unknown protein	function unknown protein
CBN73926.1	hypothetical protein Esi_0009_0056	hypothetical protein Esi_0009_0056
CBN74257.1	EsV-1-7	n/a
CBN75785.1	flagellar protofilament ribbon protein	flagellar protofilament ribbon protein
CBJ31560.1	conserved unknown protein	bis(5 -nucleosyl)- symmetrical
CBJ28994.1	expressed unknown protein	expressed unknown protein
CBN78356.1	hypothetical protein Esi_0112_0024	n/a
CBJ30460.1	conserved unknown protein	tpr repeat-containing protein ddb_g0287407-like
CBN77224.1	conserved unknown protein	ion channel
CBN79605.1	conserved unknown protein	voltagegated ion channel superfamily
CBN74519.1	expressed unknown protein	expressed unknown protein
CBN75587.1	conserved unknown protein	conserved unknown protein
CBJ32137.1	conserved unknown protein	rasgap-activating-like protein 1
CBJ26318.1	Voltage Gated Calcium/Sodium Channel subunit alpha	voltage-gated ion channel superfamily
CBJ30748.1	conserved unknown protein	wd repeat-containing protein 76-like
CBJ48326.1	cryptochrome 3	probable bacterial cryptochrome
CBJ26011.1	conserved unknown protein	conserved unknown protein	C_1190051	TPR-Domain Protein
CBJ28922.1	Hypothetical protein in ptb 5\'region (ORF1)	function unknown protein
CBN78343.1	hypothetical protein Esi_0112_0002	hypothetical protein Esi_0112_0002
CBJ26122.1	conserved unknown protein	upf0704 protein c6orf165 homolog
CBN79530.1	flagellar associated protein	flagellar associated protein	C_1800011	FAP155, Flagellar Associated Protein Similar to t-Complex-Associated Testis Expressed 1, This is not Tctex1
CBJ32839.1	Molecular chaperones HSP70/HSC70, HSP70 superfamily	heat shock protein 70	C_1340012	HSP70, Heat Shock 70 kDa Protein
CBN79468.1	Calcium-dependent protein kinase, isoform 2 (CDPK 2) Protein kinase domain containing protein	calcium-dependent protein	C_170065	FAP223, Flagellar Associated Protein Similar to Calcium-Dependent Protein Kinase
CBJ30951.1	conserved unknown protein	function unknown protein
CBJ28331.1	Tubular mastigoneme-related protein	tubular mastigoneme-related protein
CBJ30656.1	conserved unknown protein	rab6 gtpase activating gapcena (rabgap1 protein)
CBJ48862.1	n/a	14-3-3-like protein	C_1090001	FTT, 14-3-3
CBN78578.1	UDP-glucose 4-epimerase	udp-glucose 4-epimerase
CBN75242.1	flagellar radial spoke protein 16	dnaj heat shock protein	C_490039	RSP16, Radial Spoke Protein 16
CBJ48460.1	Molecular chaperones GRP78/BiP/KAR2, HSP70 superfamily	heat shock protein chaperone	C_1340012	HSP70, Heat Shock 70 kDa Protein
CBJ32589.1	pyruvate kinase	pyruvate kinase	C_2590004	Similar to Pyruvate Kinase
CBJ28516.1	Ankyrin	ankyrin repeat transient receptor potential channel
CBN73796.1	conserved unknown protein (Partial)	abc transporter b family protein
CBN73983.1	putative initiation factor eIF3 g subunit	eukaryotic translation initiation factor 3 p42
CBJ27258.1	conserved unknown protein	tpr-like protein
CBJ27270.1	conserved unknown protein	function unknown protein	C_160226	FLA8 Kinesin II Motor Protein
CBJ27319.1	expressed unknown protein	wdr26 protein
CBJ31173.1	hypothetical protein Esi_0237_0008	hypothetical protein Esi_0237_0008
CBN79933.1	conserved unknown protein	zinc finger protein
CBJ49020.1	conserved unknown protein	ptype atpase
CBJ27373.1	conserved unknown protein	conserved unknown protein
CBN75015.1	NB-ARC and TPR repeat-containig protein	tfp pilus assembly protein	C_110068	FAP185, Conserved Uncharacterized Flagellar Associated Protein
CBJ48949.1	conserved unknown protein	si:ch211- protein
CBJ31384.1	conserved unknown protein	tubulin-tyrosine ligase family	C_870039	FAP267, Conserved Uncharacterized Protein Similar to Tubulin-Tyrosine Ligase
CBJ48982.1	ankyrin repeat domain protein	ankyrin repeat protein	C_360070	FAP175, Flagellar Associated Conserved Uncharacterized Protein with Ankyrin Repeats
CBJ28896.1	similar to protein phosphatase 1, catalytic subunit, gamma isoform isoform 2	serine threonine-protein phosphatase pp1-gamma catalytic subunit	C_2260011	PP1, Phosphatase 1
CBJ31704.1	conserved unknown protein	cap-gly domain-containing linker protein 3
CBJ29317.1	conserved unknown protein	ran-binding protein
CBJ28028.1	Acetoacetate--CoA ligase	acetoacetyl- synthase
CBN80154.1	expressed unknown protein	expressed unknown protein
CBN78071.1	conserved unknown protein	tubulin polyglutamylase ttll5-like	C_870039	FAP267, Conserved Uncharacterized Protein Similar to Tubulin-Tyrosine Ligase
CBN78675.1	conserved unknown protein	coiled-coil domain containing 147	C_230118	FAP58, Conserved Uncharacterized Flagellar Associated Protein
CBN78613.1	hypothetical protein Esi_0137_0063	hypothetical protein Esi_0137_0063
CBN78348.1	conserved unknown protein	protein phosphatase 2c 51	C_520010	Similar to Protein Phosphatase 2C
CBN75453.1	EsV-1-7	n/a
CBN76034.1	conserved unknown protein	conserved unknown protein
CBN75930.1	conserved unknown protein	anoctamin-10 isoform 4
CBN75761.1	conserved unknown protein	conserved unknown protein
CBJ26853.1	conserved unknown protein	function unknown protein
CBJ31648.1	hypothetical protein Esi_0270_0042	hypothetical protein Esi_0270_0042
CBJ30466.1	conserved unknown protein	abc1 family protein
CBJ30426.1	hypothetical protein Esi_0189_0059	hypothetical protein Esi_0189_0059
CBJ33178.1	L-ascorbate peroxidase	ascorbate peroxidase
CBN75005.1	hypothetical protein Esi_0064_0048	hypothetical protein Esi_0064_0048
CBJ32191.1	conserved unknown protein	conserved unknown protein
CBN77371.1	conserved unknown protein	tubulin-tyrosine ligase family protein
CBN78623.1	conserved unknown protein	function unknown protein
CBN76605.1	Heat shock protein 40 like protein/ DnaJ domain containing protein	chaperone protein
CBJ25651.1	possible ABC-like PK	abc-1 domain-containing protein
CBJ48847.1	Soluble NSF Attachment Protein (SNAP) Receptor (SNARE)	qa- syp4 tlg2p syntaxin 16-type
CBJ33456.1	conserved unknown protein	function unknown protein
CBJ26686.1	conserved unknown protein	ricin-containing lipase tectonin-like protein
CBJ48503.1	expressed unknown protein	expressed unknown protein
CBJ29876.1	conserved unknown protein	conserved unknown protein
CBN75721.1	conserved unknown protein	conserved unknown protein	C_80172	FAP106, Conserved Uncharacterized Flagellar Associated Protein
CBN77061.1	conserved unknown protein	c-myc binding protein	C_20048	FAP174, Flagellar Associated Protein Similar to Myc-Binding Protein
CBJ30830.1	conserved unknown protein	membrane-associated progesterone receptor component 2
CBN73956.1	basal body protein	basal body protein
CBJ31355.1	Heat Shock transcription factor	heat shock factor protein
CBN78795.1	hypothetical protein Esi_0006_0205	hypothetical protein Esi_0006_0205
CBN77982.1	argininosuccinate lyase	argininosuccinate lyase
CBN79211.1	TYRosinase family member (tyr-4)	ortho-aminophenol oxidase
CBN74747.1	expressed unknown protein	expressed unknown protein
CBN74045.1	centrin	caltractin	C_1500009	VFL2, Caltractin / Centrin, 20 kD Calcium-Binding Protein
CBJ28197.1	ARL6L, ARF-like Ras superfamily GTPase	adp-ribosylation factor-like protein 6-like	C_970056	ARL6, ADP-Ribosylation Factor-Like Protein 6 (2 overlapping peptides)
CBJ26670.1	expressed unknown protein	expressed unknown protein
CBJ28610.1	conserved unknown protein	nuclear lim factor interactor-interacting protein cleavage-specific form
CBJ26674.1	conserved unknown protein	conserved unknown protein	C_1190051	TPR-Domain Protein
CBJ28433.1	Ngdn protein	ngdn protein
CBN76910.1	hypothetical protein Esi_0024_0016	hypothetical protein Esi_0024_0016
CBJ31429.1	hypothetical protein Esi_0255_0023	hypothetical protein Esi_0255_0023
CBJ27020.1	conserved unknown protein	autoinhibited calcium atpase	C_370080	Similar to Calcium-Transporting ATPase
CBJ29776.1	expressed unknown protein	expressed unknown protein
CBN78085.1	conserved unknown protein	calpain-7 (c02 family)
CBN77951.1	Serine/threonine protein kinase/TGF-beta stimulated factor	serine threonine-protein kinase 16	C_160119	CNK6, NIMA-related kinase 6
CBN77474.1	conserved unknown protein	function unknown protein
CBN76905.1	filamentous temperature sensitive Z	cell division protein
CBN79777.1	expressed unknown protein	expressed unknown protein
CBN76804.1	conserved unknown protein	function unknown protein
CBN75154.1	conserved unknown protein	morn repeat protein	C_120055	RSP1, Radial Spoke Protein 1
CBJ32325.1	conserved unknown protein	tpr repeat-containing protein
CBJ25541.1	conserved unknown protein	uncharacterized conserved protein
CBJ31233.1	gill-specific calpain	gill-specific calpain	C_620044	FAP135, Flagellar Associated Protein Similar to Calpain-Like Protein
CBJ30423.1	hypothetical protein Esi_0189_0054	hypothetical protein Esi_0189_0054
CBJ29112.1	conserved unknown protein	tpr repeat-containing protein
CBJ29039.1	conserved unknown protein	tak1	C_160119	CNK6, NIMA-related kinase 6
CBN80096.1	cAMP-dependent protein kinase catalytic subunit (PKA)	cgmp-dependent protein	C_50062	PKG, Similar to cGMP-Dependent Protein Kinase
CBJ30928.1	Aldo/Keto Reductase	aldo-keto reductase
CBN80306.1	Histidine kinase-like protein	pas pac sensor hybrid histidine kinase
CBJ28879.1	conserved unknown protein	function unknown protein
CBN76131.1	conserved unknown protein	p25-alpha family protein	C_3850002	FAP265, Conserved Uncharacterized Protein
CBJ27572.1	41 kDa flavoprotein	nadh:flavin oxidoreductase nadh oxidase
CBJ29305.1	serine/threonine protein phosphatase	serine threonine protein phosphatase	C_180161	Similar to Protein Phosphatase
CBJ48963.1	Arf1, ARF family GTPase	adp-ribosylation factor	C_1620015	ARFA1b, ADP-Ribosylation Factor 1 (two peptides)
CBN79843.1	Flagellar WD repeat-containing protein Pf 20	flagellar wd repeat-containing protein pf 20	C_250023	FAP89, Conserved Uncharacterized Flagellar Associated Protein, Similar to Notchless
CBJ33732.1	hypothetical protein Esi_0577_0005	hypothetical protein Esi_0577_0005
CBJ31978.1	putative: flagellar outer dynein arm light chain 6	dynein light chain cytoplasmic	C_2020008	ODA-LC8, Outer Dynein Arm Light Chain 8, 8KD
CBJ31339.1	similar to spermatogenesis associated factor SPAF	spermatogenesis-associated protein 5-like	C_270130	CDC48, Conserved AAA Domain Protein
CBN75908.1	Pheophorbide a oxygenase, putative chloroplast precursor	pheophorbide a chloroplast precursor
CBN80194.1	Tubular mastigoneme-related gene	sig2-like protein
CBJ48641.1	conserved unknown protein	nucleoside diphosphate	C_1230002	FAP103, Flagellar Associated Protein Similar to Nucleoside Diphosphate Kinase
CBN80239.1	p28, 28 kDa light chain of axonemal inner dynein arms	axonemal dynein light chain p33	C_740003	IA-IC28, Inner Dynein Arm Light Chain p28
CBJ28528.1	expressed unknown protein	expressed unknown protein
CBJ33758.1	hypothetical protein Esi_0592_0002	dynein light chain cytoplasmic	C_2020008	ODA-LC8, Outer Dynein Arm Light Chain 8, 8KD
CBN75122.1	ubiquitin	ubiquitin extension protein	C_1610014	Similar to Polyubiquitin
CBN75339.1	hypothetical protein Esi_0078_0082	hypothetical protein Esi_0078_0082
CBJ30288.1	conserved unknown protein	spermatogenesis associated 4	C_660055	FAP178, Flagellar Associated Protein Similar to Testis and Spermatogenesis Cell Related Protein 2
CBJ48309.1	Dynein light chain flagellar outer dynein arm light chain LC1	dynein light chain axonemal-like	C_680013	ODA-LC1, Outer Dynein Arm Light Chain 1
CBN78634.1	conserved unknown protein	calpain-like protein
CBJ29687.1	Isocitrate lyase (Isocitrase) (Isocitratase) (ICL)	isocitrate lyase	C_1460023	Isocitrate Lyase
CBN77206.1	Heat Shock transcription factor	heat shock transcription factor
CBN79610.1	hypothetical protein Esi_0271_0041	hypothetical protein Esi_0271_0041
CBJ27457.1	conserved unknown protein	ef hand family protein
CBJ48434.1	hypothetical protein Esi_0002_0243	hypothetical protein Esi_0002_0243
CBN75772.1	hypothetical protein Esi_0174_0041	hypothetical protein Esi_0174_0041
CBJ30964.1	conserved unknown protein	function unknown protein
CBN76122.1	conserved unknown protein (Partial)	strawberry notch-like protein
CBN78148.1	conserved unknown protein	enolase	C_160138	Enolase (2-Phosphoglycerate Dehydratase) (2-Phospho-D-Glyceratehydro-Lyase)
CBJ27327.1	conserved unknown protein	nb-arc and tpr repeat-containing protein
CBN76998.1	conserved unknown protein	ecotropic viral integration site 5 protein homolog
CBJ26861.1	conserved unknown protein	function unknown protein
CBN74486.1	conserved unknown protein	acetyltransferase (isoleucine patch superfamily protein)
CBJ26280.1	hypothetical protein Esi_0029_0056	hypothetical protein Esi_0029_0056
CBJ34066.1	hypothetical protein Esi_0929_0001	hypothetical protein Esi_0929_0001
CBJ28807.1	conserved unknown protein	calcineurin subunit b	C_860007	CAM, Calmodulin
CBJ29013.1	DnaJ domain containing protein	hypotherical protein	C_490039	RSP16, Radial Spoke Protein 16
CBN79531.1	conserved unknown protein	protein kinase-like protein	C_490009	Similar to Mitogen-Activated Protein Kinase
CBN75305.1	conserved unknown protein	function unknown protein
CBN74902.1	conserved unknown protein	function unknown protein
CBJ27891.1	conserved unknown protein	s-adenosyl-l-methionine-dependent methyltransferase-like
CBJ33052.1	conserved unknown protein	conserved unknown protein
CBJ26517.1	expressed unknown protein	expressed unknown protein
CBJ32385.1	conserved unknown protein	sam domain family protein
CBJ32053.1	conserved unknown protein	conserved unknown protein
CBJ25575.1	hypothetical protein Esi_0003_0246	hypothetical protein Esi_0003_0246
CBJ25526.1	conserved unknown protein	function unknown protein
CBJ31524.1	similar to regulator of G-protein signaling 16	regulator of g-protein signaling 16
CBJ31415.1	conserved unknown protein	mitogen-activated protein kinase kinase 2	C_100034	FA2, Protein Kinase
CBJ31176.1	putative scytonemin-related tyrosinase	scytonemin-related tyrosinase
CBJ29525.1	hypothetical protein Esi_0150_0004	hypothetical protein Esi_0150_0004
CAT18807.1	Light-independent protochlorophyllide reductase subunit B	light-independent protochlorophyllide reductase subunit b
CBN76657.1	expressed unknown protein	expressed unknown protein
CBJ26379.1	hypothetical protein Esi_0032_0101	hypothetical protein Esi_0032_0101
CBJ25638.1	conserved unknown protein	major facilitator superfamily
CBJ32601.1	expressed unknown protein	expressed unknown protein
CBN78469.1	conserved unknown protein	function unknown protein
CBJ33997.1	conserved unknown protein	serine threonine protein kinase	C_160119	CNK6, NIMA-related kinase 6
CBJ27239.1	conserved unknown protein	transmembrane protein
CBJ32590.1	pseudouridine synthase	pseudouridylate synthase 7 homolog
CBN78315.1	ATP-binding cassette superfamily	atp-binding cassette superfamily
CBN78985.1	conserved unknown protein	conserved unknown protein	C_490074	FAP238, Flagellar Associated Protein
CBJ27374.1	similar to ankyrin 2,3/unc44	ankyrin repeat protein	C_360070	FAP175, Flagellar Associated Conserved Uncharacterized Protein with Ankyrin Repeats
CBJ31699.1	expressed unknown protein	expressed unknown protein
CBJ26220.1	expressed unknown protein	expressed unknown protein
CBJ49245.1	conserved unknown protein	ddb1- and cul4-associated factor 8-like
CBJ31062.1	putative, spindle assembly abnormal protein 6	spindle assembly abnormal protein 6 homolog
CBJ30276.1	conserved unknown protein	rac-beta serine threonine-protein kinase-	C_740056	Similar to Cyclic Nucleotide Dependent Protein Kinase
CBJ28687.1	conserved unknown protein	kif1-binding protein homolog
CBJ28634.1	conserved unknown protein	family protein
CBJ28163.1	conserved unknown protein	flagellar associated protein	C_310047	FAP43, Conserved Uncharacterized Flagellar Associated Protein
CBJ26706.1	ankyrin repeat domain protein	ankyrin repeat protein	C_990019	FAP164, Flagellar Associated Protein with Ankyrin Repeats
CBJ27464.1	UDP-glucose:glycoprotein glucosyltransferase, N-terminal fragment, family GT24	udp-glucose:glycoprotein glucosyltransferase
CBN78110.2	Heat Shock transcription factor (Partial)	heat shock transcription factor
CBN77922.1	Glycosyltransferase, family GT64	function unknown protein
CBN77481.1	hypothetical protein Esi_0059_0120	hypothetical protein Esi_0059_0120
CBN77176.1	hypothetical protein Esi_0038_0032	hypothetical protein Esi_0038_0032
CBN76203.1	hypothetical protein (Partial)	hypothetical protein (Partial)
CBJ33832.1	conserved unknown protein	lao ao transport system atpase
CBJ27178.1	conserved unknown protein	conserved unknown protein
CBJ32744.1	conserved unknown protein	septum site-determining protein
CBJ49210.1	expressed unknown protein	expressed unknown protein
CBN75112.1	expressed unknown protein	axonemal dynein light chain p33
CBN76611.1	GPA4, alpha subunit of a heterotrimeric G protein	g-protein subunit alpha 8
CBN78919.1	Peroxyredoxin	tsa family protein	C_2230003	Similar to Peroxiredoxin
CBJ25596.1	malate dehydrogenase	nadp-dependent malic enzyme
CBJ27486.1	conserved unknown protein	ef hand family protein	C_510069	FAP161, Flagellar Associated Protein
CBN75735.1	conserved unknown protein	conserved unknown protein
CBJ26377.1	conserved unknown protein	conserved unknown protein
CBN74777.1	hypothetical protein Esi_0041_0144	hypothetical protein Esi_0041_0144
CBJ26892.1	conserved unknown protein	oligosaccharide translocation protein rft1
CBJ29159.1	conserved unknown protein	function unknown protein
CBJ33641.1	conserved unknown protein	heparan sulfate glucosamine 3-o-sulfotransferase 3a1
CBJ48509.1	Hypothetical leucine rich repeat protein	hypothetical leucine rich repeat protein
CBJ30024.1	hypothetical protein Esi_0171_0039	hypothetical protein Esi_0171_0039
CBJ30068.1	FirrV-1-B30 precursor	n/a
CBN74437.1	similar to TAK1 (TGF-beta-activated kinase)	tak1 (tgf-beta-activated kinase)	C_1910003	Similar to MAP3K delta-1 Protein Kinase
CBN77309.1	conserved unknown protein	probable exonuclease mut-7 homolog	C_330103	Similar to Ran-binding protein 1, RanBP1
CBN79681.1	Dihydrolipoamide acetyltransferase	dihydrolipoamide s-acetyltransferase (e2 component of pyruvate dehydrogenase complex)
CBN79461.1	conserved unknown protein	integral membrane protein involved in cell shape determination
CBN79936.1	hypothetical protein Esi_0015_0124	hypothetical protein Esi_0015_0124
CBN79261.1	Myosin light chain kinase (MLCK)	myosin light chain kinase	C_800022	Similar to Calcium/Calmodulin-Dependent Protein Kinase
CBN76496.1	conserved unknown protein	conserved unknown protein
CBN75340.1	hypothetical protein Esi_0078_0083	hypothetical protein Esi_0078_0083
CBN74963.1	conserved unknown protein	soul heme-binding-like protein
CBN75501.1	conserved unknown protein	function unknown protein
CBJ27711.1	hypothetical protein Esi_0083_0040	hypothetical protein Esi_0083_0040
CBJ26974.1	conserved unknown protein	cs-domain containing conserved in apicomplexa
CBJ26655.1	conserved unknown protein	fanconi anemia group d2 protein
CBJ48613.1	NB-ARC and TPR repeat-containing protein-likely pseudogene	nb-arc and tpr repeat-containing protein	C_110068	FAP185, Conserved Uncharacterized Flagellar Associated Protein
CBJ25619.1	PObg1, plastid Obg/CgtA-like GTPase 1	function unknown protein	C_50032	Similar to GTP-Binding Protein
CBJ31564.1	hypothetical protein Esi_0265_0018	hypothetical protein Esi_0265_0018
CBJ30644.1	conserved unknown protein	u1 small nuclear ribonucleoprotein
CBJ49167.1	glutaredoxin	monothiol glutaredoxin-s17
CBJ30034.1	conserved unknown protein	sulfate permease family
CBJ29186.1	conserved unknown protein	conserved unknown protein
CBJ28512.1	conserved unknown protein	protein phosphatase 2a regulatory b
CBJ27103.1	ascorbate peroxidase	ascorbate peroxidase
CBJ32104.1	conserved unknown protein	dynein light chain roadblock-type 1	C_70068	DLC7b, Roadblock-Like Dynein Light Chain
CBN76967.1	radial spoke protein 12	peptidyl-prolyl cis-trans isomerase-like 6-like	C_3230001	Peptidylprolyl Isomerase, Cyclophilin 1, Similar to Radial Spoke Protein RSP12
CBJ29903.1	GDP-mannose 6-dehydrogenase	udp-glucose 6-dehydrogenase
CBN79835.1	conserved unknown protein	ankrd44 protein	C_10069	FAP254, Conserved Uncharacterized Protein with Ankyrin Repeats
CBJ27495.1	flagellar inner arm dynein light chain Tctex1	flagellar inner arm dynein light chain tctex1
CBN78729.1	expressed unknown protein	expressed unknown protein
CBJ26026.1	short-chain alcohol dehydrogenase-like protein	short-chain dehydrogenase reductase sdr
CBJ32017.1	similar to ubiquitin	polyubiquitin c	C_330025	Similar to Polyubiquitin
CBJ28572.1	conserved unknown protein	abc transporter b family protein
CBJ34187.1	hypothetical protein Esi_1304_0001	hypothetical protein Esi_1304_0001
CBJ27197.1	expressed unknown protein	expressed unknown protein
CBJ27002.1	UDP-glucose 6-dehydrogenase	udp-glucose 6-dehydrogenase
CBJ34262.1	conserved unknown protein	dynein heavy chain	C_80197	DHC2, Dynein Heavy Chain 2
CBJ27174.1	phosphatase PP1	serine threonine-protein phosphatase pp1	C_2260011	PP1, Phosphatase 1
CBJ29307.1	Heat shock protein 70, likely pseudogene	heat shock protein 70	C_1340012	HSP70, Heat Shock 70 kDa Protein
CBJ25580.1	flagellar associated protein	wd repeat-containing protein 65	C_1000046	FAP57, Conserved Uncharacterized Flagellar Associated Protein
CBN78577.1	udp-n-acetylglucosamine pyrophosphorylase	udp-n-acetylglucosamine pyrophosphorylase
CBN75446.1	conserved unknown protein	conserved unknown protein
CBJ26021.1	conserved unknown protein	conserved unknown protein
CBJ33055.1	conserved unknown protein	nucleoporin 155
CBJ30734.1	conserved unknown protein	protein dpy-30 homolog
CBN76541.1	conserved unknown protein	ef-hand calcium-binding domain-containing protein 2-like	C_860007	CAM, Calmodulin
CBN73927.1	GPA5, alpha subunit of a heterotrimeric G protein	g-protein subunit alpha 8
CBJ33842.1	conserved unknown protein	pogo transposable element with krab domain
CBJ29580.1	galactose-4-epimerase, UDP	udp-glucose 4-epimerase	C_340079	Similar to dUDP-Glucose 4-6-Dehydratase
CBJ27698.1	conserved unknown protein	glucosidase 2 subunit
CBN74908.1	conserved unknown protein	upf0533 protein c5orf44 homolog
CBN78920.1	conserved unknown protein	conserved unknown protein
CBJ48537.1	conserved unknown protein (Partial)	function unknown protein
CBN78393.1	flagellar outer dynein arm-docking complex	flagellar outer dynein arm-docking complex protein 1	C_970037	ODA-DC2, Outer Dynein Arm Docking Complex 2, Mr 70,000
CBJ26295.1	conserved unknown protein	function unknown protein
CBJ32677.1	BiP	78 kda glucose-regulated protein precursor	C_1340012	HSP70, Heat Shock 70 kDa Protein
CBJ32668.1	expressed unknown protein	expressed unknown protein
CBJ34252.1	expressed unknown protein	expressed unknown protein
CBJ29830.1	conserved unknown protein	soluble nsf attachment protein receptor
CBJ28440.1	Cobalamin synthesis protein (ISS)	function unknown protein
CBJ18018.1	cytochrome oxidase subunit I	cytochrome c oxidase subunit 1
CBN77841.1	conserved unknown protein	ankyrin unc44	C_360070	FAP175, Flagellar Associated Conserved Uncharacterized Protein with Ankyrin Repeats
CBN77702.1	conserved unknown protein	pi-plc x domain-containing protein 3-like
CBN80486.1	EsV-1-199	n/a	C_180035	FAP87, Flagellar Associated Protein with Ankyrin Repeats
CBN74956.1	cytochrome P450	cytochrome p450
CBN75609.1	conserved unknown protein	nudix (nucleoside diphosphate linked moiety x)-type motif 1
CBJ25750.1	expressed unknown protein	expressed unknown protein
CBJ26874.1	ATP synthase: assembly factor for F1 component	atp10 protein
CBJ33223.1	protein phosphatase 2C	protein phosphatase 2c	C_520010	Similar to Protein Phosphatase 2C
CBJ32040.1	conserved unknown protein	conserved unknown protein
CBJ31175.1	conserved unknown protein	gnat family
CBJ30824.1	hypothetical protein Esi_0216_0050	hypothetical protein Esi_0216_0050
CBJ30522.1	conserved unknown protein	hypothetical leucine rich repeat calcium binding protein
CBJ25887.1	Mannuronan C-5-epimerase	mannuronan c-5-epimerase
CBJ28947.1	hypothetical protein Esi_0124_0086	hypothetical protein Esi_0124_0086
CBJ28926.1	hypothetical protein Esi_0124_0034	potassium channel tetramerisation domain containing 3
CBJ34157.1	hypothetical protein Esi_1144_0002	hypothetical protein Esi_1144_0002
CBN79996.1	transmembrane protein, putative	function unknown protein
CBN79240.1	WSC domain containing protein	wsc domain containing protein
CBN77675.1	Beta-(1,2)-xylosyltransferase	uncharacterized glycosyltransferase aer61-like
CBN79817.1	Carnitine/choline O-acyltransferase	carnitine acetyl transferase
CBN78605.1	expressed unknown protein	expressed unknown protein
CBN76288.1	hypothetical protein Esi_0512_0006	hypothetical protein Esi_0512_0006
CBN76224.1	conserved unknown protein	conserved unknown protein
CBJ25733.1	similar to Endoplasmic reticulum-Golgi intermediate compartment protein 1 (ER-Golgi intermediate compartment 32 kDa protein) (ERGIC-32)	endoplasmic reticulum-golgi intermediate compartment 1
CBJ26656.1	conserved unknown protein	serine protease family
CBJ32337.1	conserved unknown protein	function unknown protein
CBJ29924.1	ankyrin domain protein	ankyrin domain protein
CBJ49014.1	Soluble NSF Attachment Protein (SNAP) Receptor (SNARE)	vesicle transport through interaction with t-snares homolog 1a-like
CBN79354.1	hypothetical protein Esi_0201_0014	hypothetical protein Esi_0201_0014
CBN78797.1	hypothetical protein Esi_0006_0207	hypothetical protein Esi_0006_0207
CBN79479.2	ankyrin (Partial)	ankyrin repeat protein	C_360070	FAP175, Flagellar Associated Conserved Uncharacterized Protein with Ankyrin Repeats
CBJ28302.1	hypothetical protein Esi_0098_0047	hypothetical protein Esi_0098_0047
CBN77257.1	conserved unknown protein	candicidin biosynthesis protein
CBN76609.1	hypothetical protein Esi_0000_0332	hypothetical protein Esi_0000_0332
CBN76444.1	calmodulin 2	calmodulin
CBN76256.1	thioredoxin-like 5	thioredoxin-like 5
CBJ27140.1	expressed unknown protein	expressed unknown protein
CBN80267.1	Glutathione S-transferase	glutathione s-transferase	C_650009	Similar to Glutathione S-Transferase
CBJ25742.1	conserved unknown protein	protein kinase domain protein
CBN79273.1	conserved unknown protein	actin-like protein
CBJ28530.1	Dynein light chain 4, axonemal	dynein light chain axonemal	C_2020008	ODA-LC8, Outer Dynein Arm Light Chain 8, 8KD
CBN78495.1	conserved unknown protein	function unknown protein
CBN74349.1	conserved unknown protein	wd repeat domain 47
CBJ29376.1	conserved unknown protein	adenylate kinase	C_1390012	ODA5-Associated Adenylate Kinase
CBN77130.1	conserved unknown protein	ubx domain-containing protein
CBJ29127.1	conserved unknown protein	galactosylceramide sulfotransferase-like
CBN78783.1	hypothetical protein Esi_0006_0189	hypothetical protein Esi_0006_0189
CBJ25837.1	hypothetical protein Esi_0016_0147	hypothetical protein Esi_0016_0147
CBJ31830.1	conserved unknown protein	protein fam18b1-like
CBJ26900.1	putative periplasmic protease	periplasmic protease
CBN73893.1	Chain A, Crystal Structure Of A Designed Full Consensus Ankyrin	ankyrin repeat domain protein	C_990019	FAP164, Flagellar Associated Protein with Ankyrin Repeats
CBJ28969.1	expressed unknown protein	expressed unknown protein
CBN80324.1	EsV-1-21	serine threonine-protein phosphatase 6 regulatory ankyrin repeat subunit c- partial	C_360070	FAP175, Flagellar Associated Conserved Uncharacterized Protein with Ankyrin Repeats
CBN77270.1	conserved unknown protein	phosphatidylinositol kinase (pik-5)
CBN78858.1	calcium homeostasis endoplasmic reticulum protein	calcium homeostasis endoplasmic reticulum protein
CBN79812.1	SH2 domain containing protein	sh2 domain containing protein
CBN80184.1	eukaryotic initiation factor 4E	eukaryotic translation initiation factor 4e-1
CBN78188.1	hypothetical protein Esi_0103_0027	hypothetical protein Esi_0103_0027
CBN79158.1	hypothetical protein Esi_0010_0046	hypothetical protein Esi_0010_0046
CBN76553.1	conserved unknown protein	protein arginine n-methyltransferase
CBN76042.1	ubiquinol cytochrome c reductase subunit QCR7	ubiquinol-cytochrome c reductase subunit 7
CBN75752.1	conserved unknown protein	cysteine-rich polycomb-like protein
CBJ27467.1	expressed unknown protein	expressed unknown protein
CBJ30133.1	transmembrane protein TPARL, putative	transmembrane protein 165
CBJ29886.1	expressed unknown protein	constans-like b
CBJ29071.1	UDP-galactose translocator, putative	function unknown protein
CBN80045.1	Inositol 2-dehydrogenase	myo-inositol 2-dehydrogenase
CBJ28198.1	conserved unknown protein	radial spoke head protein 3 homolog	C_290063	RSP3, Radial Spoke Protein 3
CBN78892.1	hypothetcal protein	mps one binder kinase activator-like 1a
CAT18825.1	cytochrome b6	cytochrome b6
CBJ25899.1	Possible CBL-interacting-like PK	cbl-interacting serine threonine-protein	C_800022	Similar to Calcium/Calmodulin-Dependent Protein Kinase
CAT18823.1	ATP synthase CF1, subunit alpha	atp synthase cf1 alpha chain	C_50178	Similar to Vacuolar ATP Synthase Subunit B
CBJ25536.1	flagellar associated protein, adenosine kinase-like protein	adenosine kinase	C_120080	FAP278, Flagellar Associated Protein Similar to Adenosine Kinase
CBJ29197.1	Heat shock protein 90	heat shock protein 90	C_730014	Similar to Heat Shock Protein
CBN77293.1	conserved unknown protein (Partial)	coiled-coil domain-containing protein 135-like
CBJ32822.1	glyceraldehyde-3-phosphate dehydrogenase	glyceraldehyde-3-phosphate type i	C_280107	GAP3, Glyceraldehyde-3-Phosphate Dehydrogenase
CBJ30340.1	triosephosphate isomerase/glyceraldehyde-3-phosphate dehydrogenase	triosephosphate isomerase glyceraldehyde-3-phosphate dehydrogenase	C_280107	GAP3, Glyceraldehyde-3-Phosphate Dehydrogenase
CBJ27559.1	salt overly sensitive 1-like protein	salt-overly-sensitive 1
CBJ26993.1	GDP-mannose 6-dehydrogenase	udp-glucose 6-dehydrogenase
CBJ31072.1	conserved unknown protein	flagellar associated protein	C_650031	FAP73, Conserved Uncharacterized Flagellar Associated Protein
CBN78049.1	RNA-binding region-containing protein (RNP-1)	rna-binding region rnp-1 domain-containing protein
CBJ28573.1	ATP-binding cassette transporter	atp-binding cassette superfamily
CBJ32979.1	hypothetical protein Esi_0399_0011	ha-tagged protein kinase domain of mitogen-activated protein kinase kinase kinase	C_1220044	CNK2, NIMA-Related Kinase 2
CBN75458.1	Intraflagellar transport protein 172	intraflagellar transport protein 172	C_170190	IFT172, Intraflagellar Transport Protein 172
CBJ29675.1	hypothetical protein Esi_0156_0039	protein phosphatase 2c and cyclic nucleotide-binding kinase domain-containing protein	C_740056	Similar to Cyclic Nucleotide Dependent Protein Kinase
CBJ30910.1	conserved unknown protein	sperm flagellar protein 2-like	C_1580011	CPC1, Central Pair Complex 1
CBN75594.1	conserved unknown protein	kinesin family member 17	C_160226	FLA8 Kinesin II Motor Protein
CBN79143.1	conserved unknown protein	cell division control protein 48	C_270130	CDC48, Conserved AAA Domain Protein
CBJ33217.1	conserved unknown protein	tpr domain containing protein
CBJ48364.1	conserved unknown protein	ankyrin repeat protein	C_360070	FAP175, Flagellar Associated Conserved Uncharacterized Protein with Ankyrin Repeats
CBJ28783.1	conserved unknown protein	coiled-coil domain-containing protein 108	C_980010	FAP65, Conserved Uncharacterized Flagellar Associated Protein
CBN80015.1	conserved unknown protein	coiled-coil domain-containing protein 164	C_1160041	FAP250, Conserved Uncharacterized Flagellar Associated Protein Similar to NYD-SP28
CBN74708.1	PF2	growth arrest-specific protein 8-like	C_1410017	PF2, Dynein Regulatory Complex Protein
CBN75935.1	radial spoke protein 7	radial spoke protein 7
CBN74315.1	Intraflagellar transport protein 140 puative	intraflagellar transport protein 140 homolog	C_640055	IFT140, Intraflagellar Transport Protein 140
CBJ28719.1	Intrafragellar transpot 52, osm-6-like protein	intraflagellar transport protein 52 homolog	C_1260018	IFT52, Intraflagellar Transport Protein 52
CBJ48362.1	Dynein light chain	dynein light chain cytoplasmic	C_2020008	ODA-LC8, Outer Dynein Arm Light Chain 8, 8KD
CBJ28010.1	kinesin-like protein	kinesin-like protein kif3b	C_160226	FLA8 Kinesin II Motor Protein
CBJ30889.1	conserved unknown protein	kinesin-like protein	C_160226	FLA8 Kinesin II Motor Protein
CBJ29997.1	Glyceraldehyde 3-phosphate dehydrogenase; alternative name: imm downregulated 12	glyceraldehyde 3-phosphate	C_280107	GAP3, Glyceraldehyde-3-Phosphate Dehydrogenase
CBN78497.1	radial spoke protein 10	radial spoke protein 10	C_900027	RSP10, Radial Spoke Protein 10
CBN77137.1	putative PKG-Ib	wd repeat-containing protein 63	C_530081	IA1-IC140, Inner Dynein Arm I1 Intermediate Chain IC140
CBJ30840.1	conserved unknown protein	myosin heavy chain kinase c-like protein
CBJ27087.1	conserved unknown protein	meiosis-specific nuclear structural protein 1	C_990023	FAP127, Flagellar Associated Protein Weakly Similar to Nuclear Structural Protein
